# Supplementary material for: G-Quadruplex Binding Properties of A Potent PARP-1 Inhibitor Derived From 7-Azaindole-1-Carboxamide
Source: Research Square preprint supplement (doi:10.21203/rs.3.rs-113630/v1), 2020-12-01
Supplement: Supplementary file 1 [file 1c724d0462b537c51631e066.docx]

**G-quadruplex binding properties of a potent PARP-1 inhibitor derived from 7-azaindole-1-carboxamide.**

**Sabrina Dallavalle1, Loana Musso1, Roberto Artali2, Anna Aviñó3, Leonardo Scaglioni1, Ramon Eritja3, Raimundo Gargallo4, Stefania Mazzini1***

1Department of Food, Environmental and Nutritional Sciences (DEFENS), University of Milan (Università degli Studi di Milano), Milan, Italy.

2Scientia Advice di Roberto Artali, 20832 Desio, MB, Italy

3Institute for Advanced Chemistry of Catalonia (IQAC), CSIC, Networking Center on Bioengineering, Biomaterials and Nanomedicine (CIBER-BBN), Barcelona, Spain.

4Department of Chemical Engineering and Analytical Chemistry, University of Barcelona, Barcelona, Spain.

**Contents:**

| Figure S1 | Aromatic and anomeric protons region of the 1D NMR titration spectra of d(AAGAATTCTT)2 with **1** at 15 °C in H2O/D20 (9:1), 0.1 M NaCl and 10 mM sodium phosphate buffer, pH = 7.0, at different R = [drug]/[DNA] ratios. |
| --- | --- |
| Figure S2 | Aromatic and anomeric protons region of the 1D NMR titration spectra of d(CGTACG)2 with **1** at 15 °C in H2O/D20 (9:1), 0.1 M NaCl and 10 mM sodium phosphate buffer, pH = 7.0, at different R = [drug]/[DNA] ratios. |
| Figure S3 | Imino proton region of 1D NMR titration spectra of Pu22T14T23 with ABT888 at 25 °C at different R = [drug]/[DNA] ratios. |
| Figure S4 | Determination of melting temperature of Pu2T14T23 in 25 mM phosphate buffer and 70 mM KCl. |
| Figure S5 | Titrations of ligand **1** with Pu22T14T23 (a) and d(TTAGGGT)4 (b) monitored with molecular fluorescence spectroscopy. Numbers in inset indicate the ratio ligand:DNA. In both cases, the initial concentration of ligand was 3 micromolar, 25 mM phosphate buffer and 70 mM KCl, 20oC. |
| Figure S6 | Titrations of ligand **1** with Pu22T14T23 (a) and d(TTAGGGT)4 (b) in PBS monitored with molecular fluorescence spectroscopy. Numbers in inset indicate the ratio ligand:DNA. In both cases, the initial concentration of ligand was 3 micromolar, PBS buffer 20oC. |
| Table S1 | Selected1 H chemical shift values for the complex of **1** with d(AAGAATTCTT)2 and d(CGTACG)2 |
| Table S2 | Selected 1 H chemical shift values for the complex of **1** with d(TTAGGGT)4 |
| Table S3 | Selected1 H chemical shift values for the complex of **1** with Pu22T14T23. |
| Table S4 | Inter-residue NOE interactions of Pu22T14T23 in the complex with **1** |

**
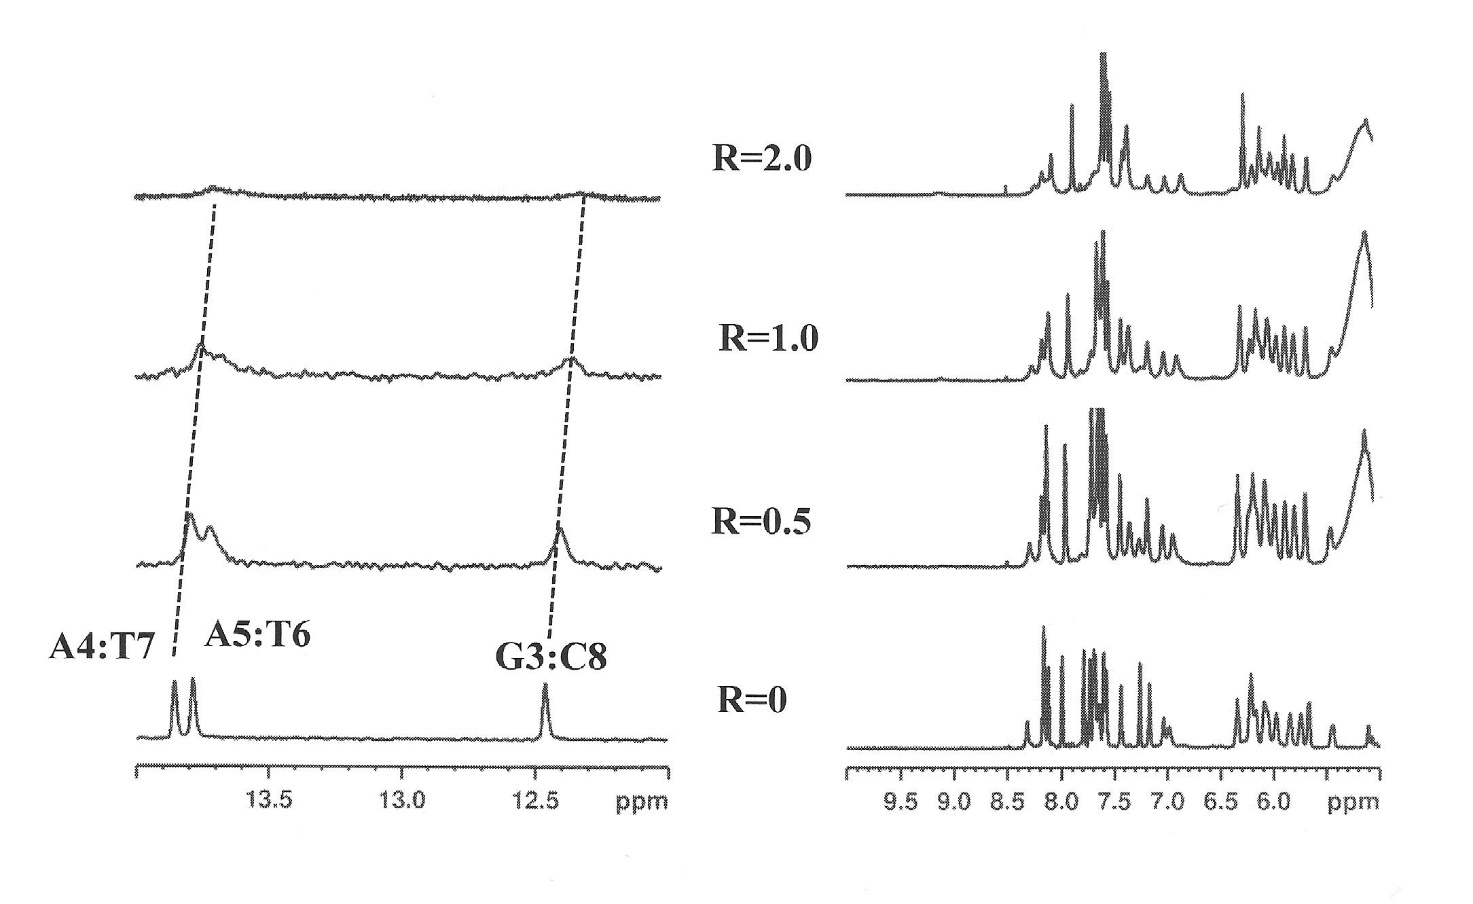
**

**Figure S1.** Aromatic and anomeric protons region of the 1D NMR titration spectra of d(AAGAATTCTT)2 with **1** at 15 °C in H2O/D20 (9:1), 0.1 M NaCl and 10 mM sodium phosphate buffer, pH = 7.0, at different R = [drug]/[DNA] ratios.


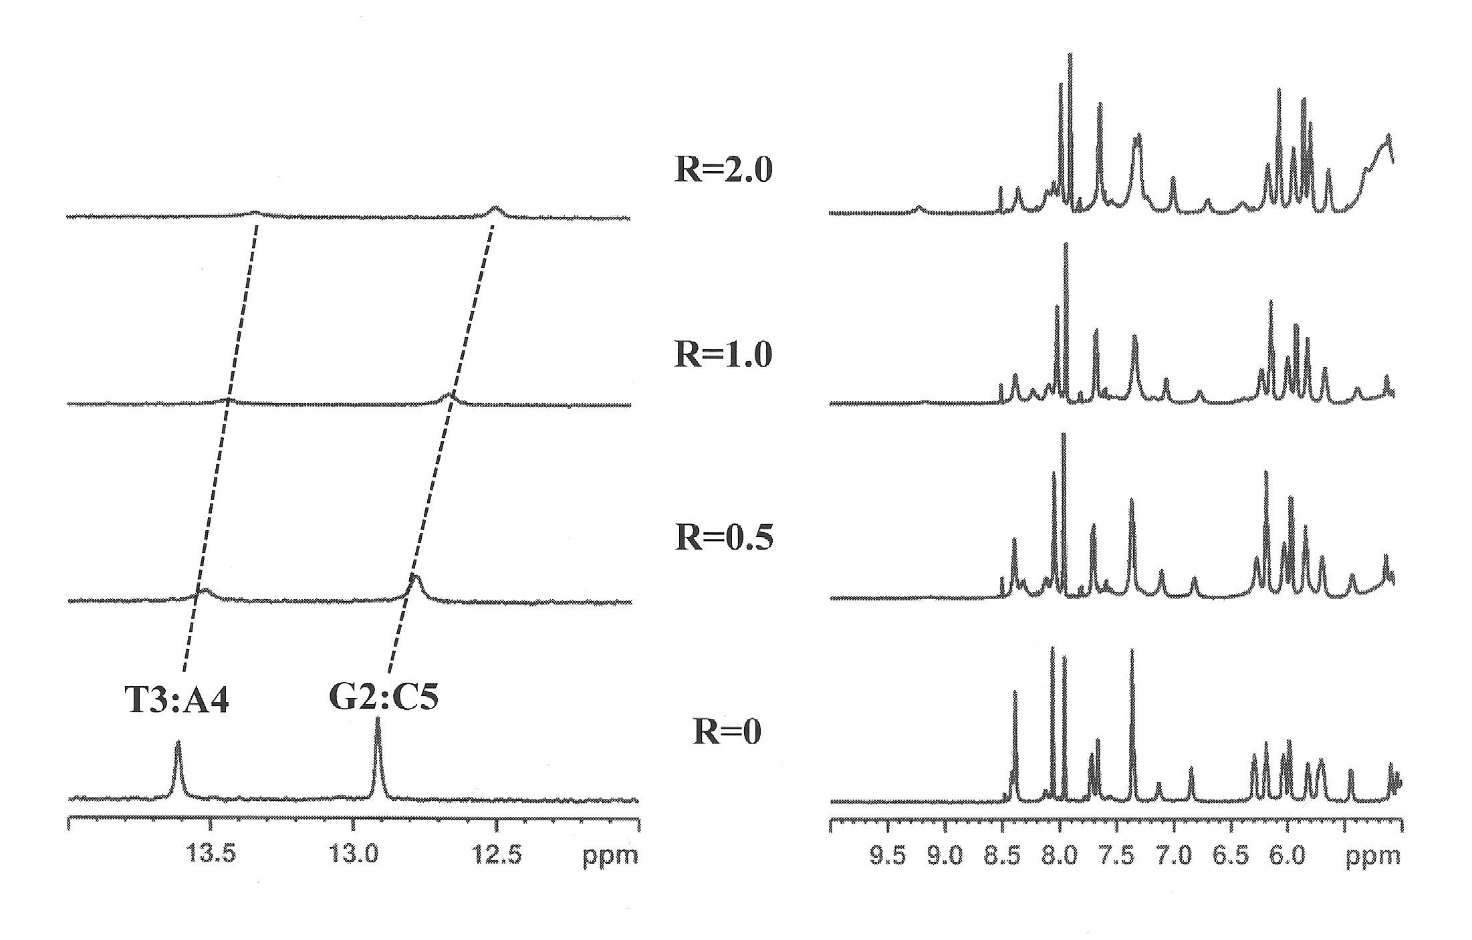


**FigureS2.** Aromatic and anomeric protons region of the 1D NMR titration spectra of d(CGTACG)2 with **1** at 15 °C in H2O/D20 (9:1), 0.1 M NaCl and 10 mM sodium phosphate buffer, pH = 7.0, at different R = [drug]/[DNA] ratios.


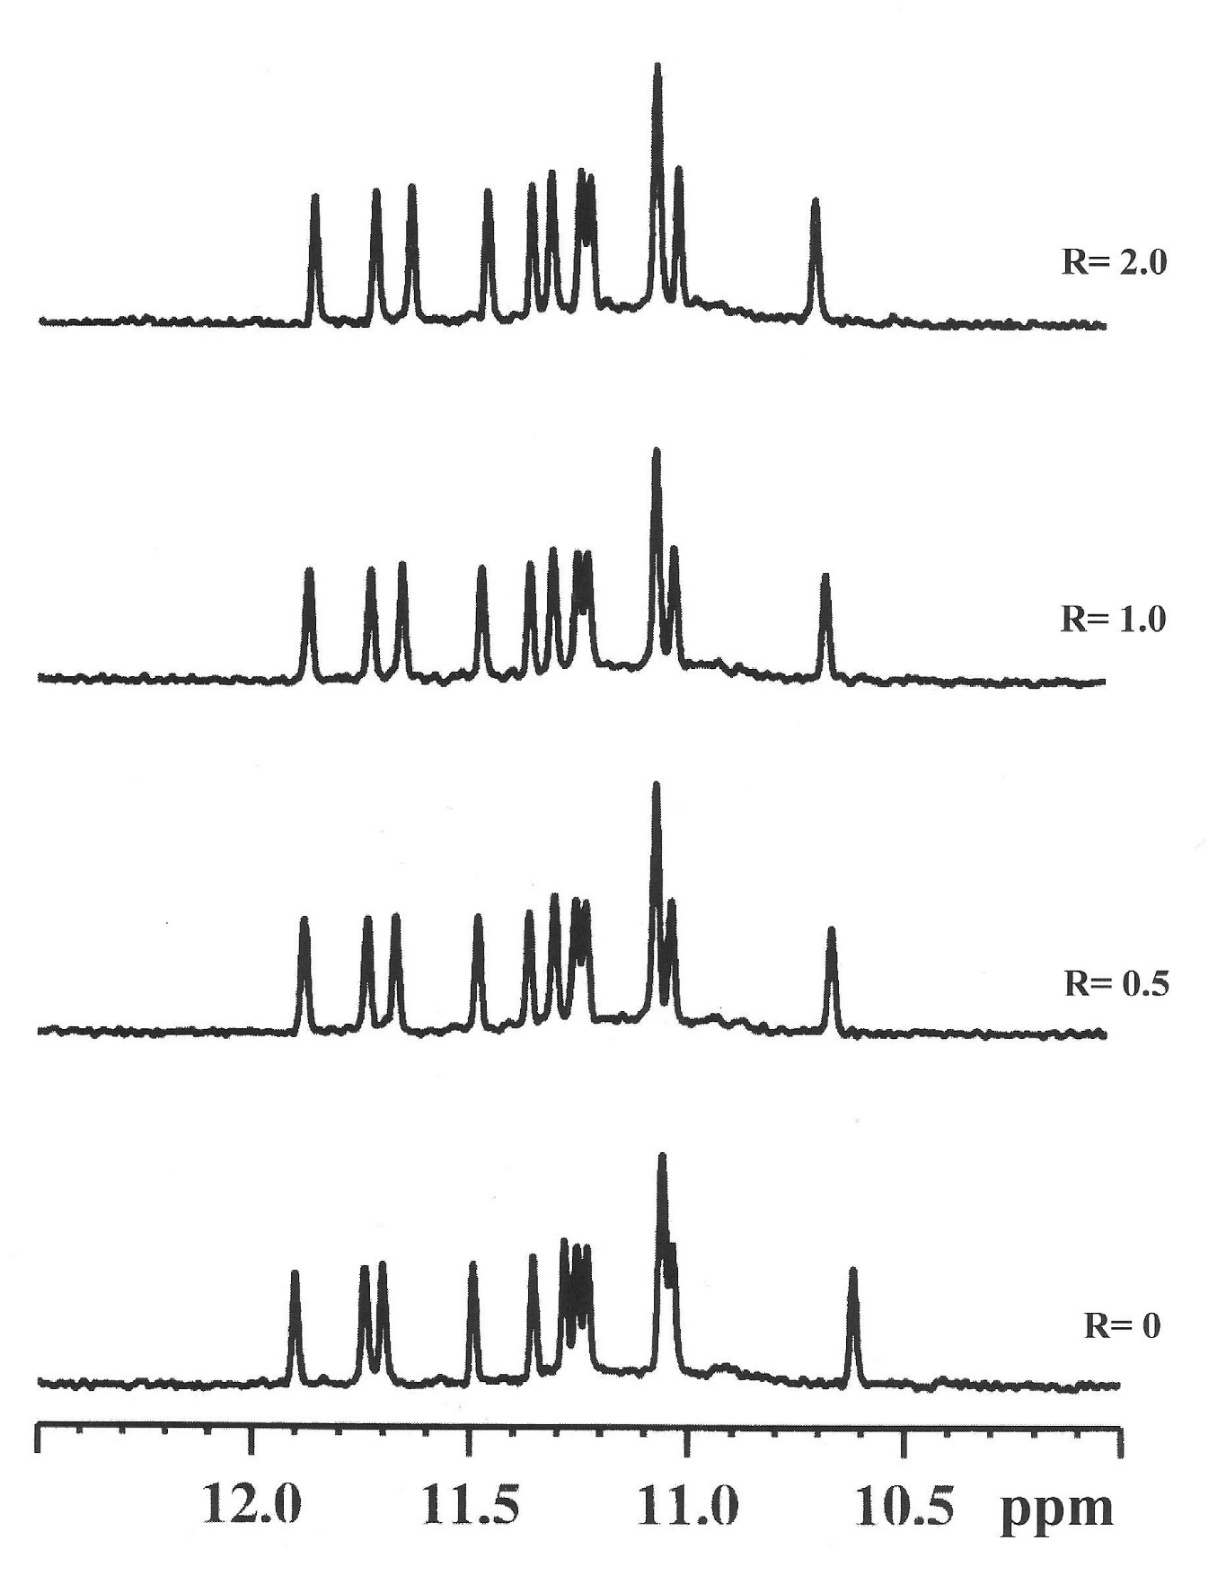


**Figure S3.** Imino proton region of 1D NMR titration spectra of Pu22T14T23 with ABT888 at 25 °C at different R = [drug]/[DNA] ratios.


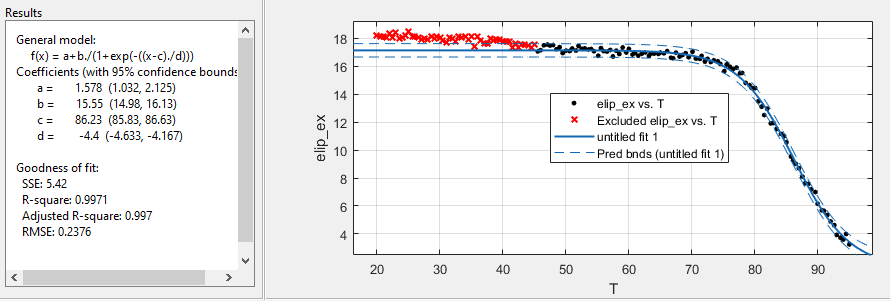


**Figure S4.** Determination of melting temperature of Pu2T14T23 in 25 mM phosphate buffer and 70 mM KCl.


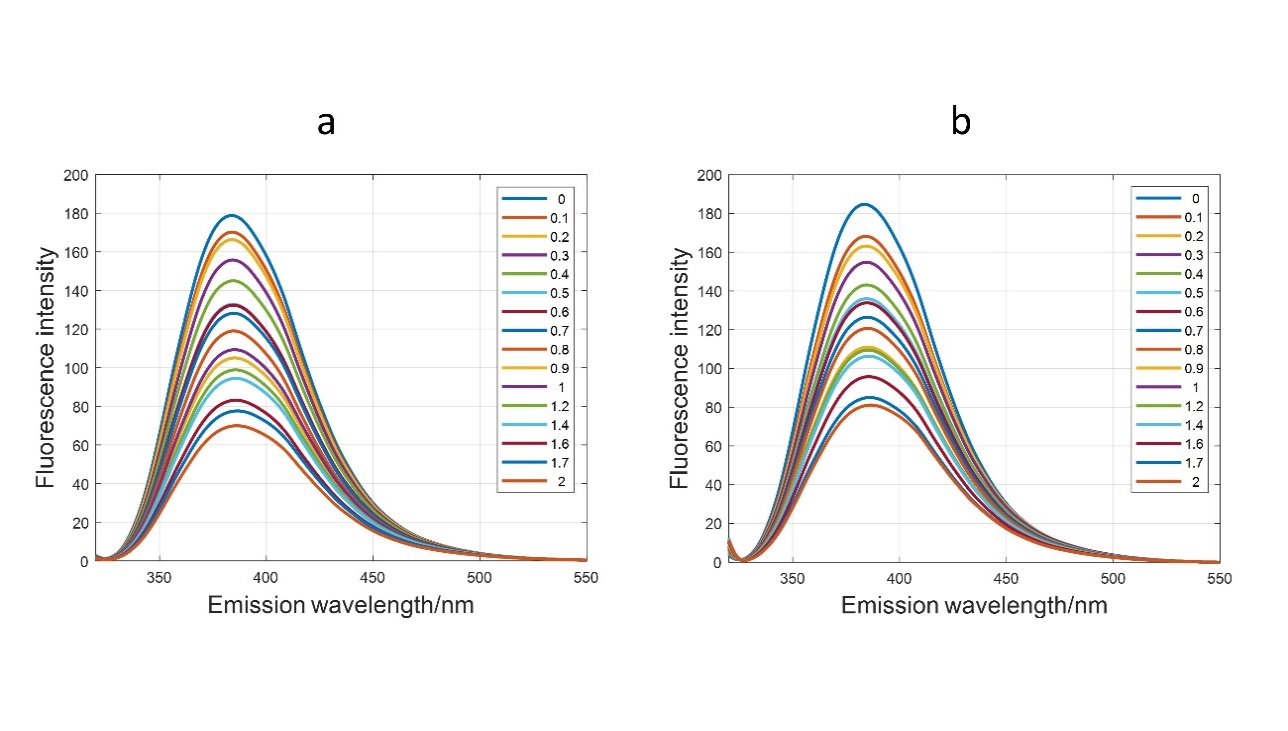


**Figure S5.** Titrations of ligand **1** with Pu22T14T23 (a) and d(TTAGGGT)4 (b) monitored with molecular fluorescence spectroscopy. Numbers in inset indicate the ratio ligand:DNA. In both cases, the initial concentration of ligand was 3 micromolar, 25 mM phosphate buffer and 70 mM KCl, 20oC.

|  |  |
| --- | --- |
|  |  |

1. **(b)**

**Figure S6.** Titrations of ligand **1** with Pu22T14T23 (a) and d(TTAGGG)4 (b) in PBS monitored with molecular fluorescence spectroscopy. Numbers in inset indicate the ratio ligand:DNA. In both cases, the initial concentration of ligand was 3 micromolar, PBS buffer 20oC.

**Table S1.** Selected1 H chemical shift values for the complex of **1** with d(AAGAATTCTT)2 and d(CGTACG)2a

| **“AATT”** | H2/H5/CH3 | Δδb | H6/H8 | Δδb | H1’ | Δδb |
| --- | --- | --- | --- | --- | --- | --- |
| A1 | n.d. | - | 7.88 | -0.13 | 5.83 | -0.02 |
| A2 | n.d. | - | 8.14 | -0.03 | 5.98 | -0.09 |
| G3 | - | - | 7.65 | -0.09 | 5.78 | +0.03 |
| A4 | n.d. | - | 8.06 | -0.08 | 5.78 | **-0.28** |
| A5 | n.d. | - | 8.14 | -0.03 | 6.18 | -0.05 |
|  |  |  |  |  |  |  |
| T6 | 1.26 | -0.04 | 7.13 | -0.07 | 5.91 | **-0.11** |
| T7 | 1.55 | -0.03 | 7.39 | -0.05 | 6.10 | **-0.11** |
| C8 | 5.63 | -0.05 | 7.59 | -0.07 | 6.03 | -0.08 |
| T9 | 1.70 | -0.10 | 7.51 | -0.08 | 6.19 | -0.04 |
| T10 | 1.78 | -0.03 | 7.50 | -0.13 | 6.24 | +0.02 |
|  | NH |  |  |  |  |  |
| A4T7 | 13.79c | -0.08 |  |  |  |  |
| A5T6 | n.d.c | -- |  |  |  |  |
| G3C8 | 12.39c | -0.07 |  |  |  |  |
|  |  |  |  |  |  |  |
| **“CG”** | H2/H5/CH3 | Δδb | H6/H8 | Δδb | H1’ | Δδb |
| C1 | 5.80 | -0.19 | 7.60 | -0.12 | 5.73 | -0.09 |
| G2 | - | - | 7.95 | -0.12 | 5.90 | **-0.13** |
| T3 | 1.42 | -0.17 | 7.29 | -0.07 | 5.89 | **+0.19** |
| A4 | 7.60 | -0.07 | 8.33 | -0.06 | 6.12 | **-0.18** |
| C5 | 5.25 | -0.19 | 7.25 | -0.11 | 5.60 | -0.10 |
| G6 | - | - | 7.87 | -0.09 | 6.02 | -0.17 |
|  | NH |  |  |  |  |  |
| C1G6 | n.d. | - |  |  |  |  |
| G2C5 | 12.64 | **-0.36** |  |  |  |  |
| T3A4 | 13.43 | **-0.19** |  |  |  |  |

a Measured at 15°C in ppm (δ) from external DSS. Solvent H2O-D2O (90:10 v/v), of 0.1 M NaCl and 10 mM sodium phosphate buffer solution, pH = 7.0; R = 2.0. bΔδ = δbound – δfree; c Very broad signal.

**Table S2.** Selected 1 H chemical shift values for the complex of **1** with d(TTAGGGT)4a

|  | H1/H2/Me | Δδb | H6/H8 | Δδ |
| --- | --- | --- | --- | --- |
| T2 | 1.80 | + 0.04 | 7.30 | -0.02 |
| A3 | n.d. | - | 8.39 | 0.00 |
| G4 | 11.44 | - 0.16 | 7.80 | - 0.12 |
| G5 | 11.10 | - 0.11 | 7.62 | - 0.15 |
| G6 | 10.72 | - 0.30 | 7.69 | + 0.01 |
| T7 | 1.70 | +0.10 | 7.48 | +0.14 |

a Measured at 25 °C in ppm (δ) from external DSS. Solvent: H2O-D2O (90:10 v/v), 25 mM K-phosphate buffer, 150 mM KCl, 1 mM EDTA, pH 6.7. T1 signals are not detected. The ribose protons showing significant shift variations are: T2H1’ Δδ= -0.25. b Δδ = δbound – δfree.

**Table S3 .** Selected1 H chemical shift values for the complex of **1** with Pu22T14T23.a

|  | H1/H2/Me | Δδb | H6/H8 | Δδ |
| --- | --- | --- | --- | --- |
| T4 | 1.55-1.75 |  | 7.33 | +0.12 |
| G5 | n.d. | - | 8.09 | +0.09 |
| A6 | 7.95 | +0.15 | n.d. |  |
| G7 | 11.40 | **- 0.36** | 7.86 | -0.16 |
| G8 | 11.01 | - 0.21 | 7.60 | -0.12 |
| G9 | 10.70 | +0.10 | 7.71 | -0.04 |
| T10 | n.d. | - | n.d. |  |
| G11 | 11.28 | **-0.43** | 7.83 | 0.04 |
| G12 | 11.34 | -0.16 | 7.86 | -0.06 |
| G13 | 10.89 | -0.16 | 7.68 | -0.18 |
| T14 | 1.77 | -0.15 | 7.65 | 0 |
| A15 | 8.35 | -0.03 | 8.54 | +0.01 |
| G16 | 11.65 | **- 0.35** | 8.15 | +0.04 |
| G17 | 11.05 | - 0.20 | 7.69 | - 0.11 |
| G18 | 10.60 | **- 0.42** | 7.68 | - 0.11 |
| T19 | 2.00 | 0.01 | 7.87 | +0.01 |
| G20 | 10.98 | **-0.30** | 7.84 | - 0.05 |
| G21 | 11.13 | -0.24 | 7.69 | -0.22 |
| G22 | 10.68 | **-0.36** | 7.68 | 0.07 |
| T23 | 1.20 | -0.28 | 7.03 | -0.11 |
| A24 | 7.25 | +0.15 | 7.38 | -0.38 |
| A25 | 7.53 | +0.14 | 7.18 | -0.32 |

a Measured at 25°C in ppm (δ) from external DSS. Solvent H2O-D2O (90:10 v/v), 25 mM K-phosphate buffer, 70 mM KCl, pH 6.9, *R* = 2.0.

b Δδ = δbound – δfree

**Table S4.** Inter-residue NOE interactions of Pu22T14T23 in the complex with **1**a

| NOEs in the tetrads | | | |
| --- | --- | --- | --- |
| *G-tetrad I* | *G-tetrad II* | *Tetrad III* | Other NOEs |
| G7H1-G11H8 | G8H1-G12H8 | G9H1-G13H8 | G13H1-G17H8 |
| G11H1-G16H8 | G12H1-G17H8 | G13H1-G18H8 |  |
| G16H1-G20H8 | G17H1-G21H8 | G18H1-G22H8 |  |
| G20H1-G7H8 | G21H1-G8H8 | G22H1-G9H8 |  |

a Acquired at 25°C in H2O-D2O (90:10 v/v), 25 mM K-phosphate buffer, 70 mM KCl, pH 6.9; R=2.0
